1  
2  
3  
4  
5  
6 **Feature-based attention enables robust,**  
7 **long-lasting location transfer in human perceptual learning**  
8

9  
10  
11  
12 Shao-Chin Hung<sup>1</sup> & Marisa Carrasco<sup>1,2,\*</sup>  
13

14 <sup>1</sup>Department of Psychology and <sup>2</sup>Center for Neural Science, New York University  
15  
16  
17  
18  
19  
20  
21  
22

23  
24 \*corresponding author: [marisa.carrasco@nyu.edu](mailto:marisa.carrasco@nyu.edu)  
25  
26  
27  
28

29 Key words: perceptual learning, feature-based attention, location transfer, orientation discrimination  
30  
31  
32

33  
34 Abstract: 150 words

35 Main text: 4,493 words

36 Figures: 6

37 Supplementary figures: 4  
38

39  
40  
41  
42  
43  
44  
45  
46  
47  
48  
49  
50  
51  
52  
53  
54  
55  
56  
57  
58  
59  
60  
61  
62  
63  
64  
65  
66  
67  
68  
69  
70  
71  
72  
73  
74  
75  
76  
77  
78  
79  
80  
81  
82  
83  
84  
85  
86  
87  
88  
89

## Abstract

Visual perceptual learning (VPL) is typically specific to the trained location and feature. However, the degree of specificity depends upon particular training protocols. Manipulating covert spatial attention during training facilitates learning transfer to other locations. Here we investigated whether feature-based attention (FBA), which enhances the representation of particular features throughout the visual field, facilitates VPL transfer, and how long such an effect would last. To do so, we implemented a novel task in which observers discriminated a stimulus orientation relative to two reference angles presented simultaneously before each block. We found that training with FBA enabled remarkable location transfer, reminiscent of its global effect across the visual field, but preserved orientation specificity in VPL. Critically, both the perceptual improvement and location transfer persisted after one year. Our results reveal robust, long-lasting benefits induced by FBA in VPL, and have translational implications for improving generalization of training protocols in visual rehabilitation.

## Introduction

The available sensory information at any given moment is far too much for the visual system to process at once. To function effectively, the visual system must establish stability and selectively process the most important information. In the short term, visual attention allows us to select relevant visual information; in the long term, perceptual learning allows us to adapt to new surroundings and to refine how sensory systems efficiently process stimuli that we regularly experience.

Perceptual learning refers to improvements in sensory discrimination due to repetitive practice, which has been observed in multiple sensory modalities, including visual [1], auditory [2], tactile [3] and olfactory [4]. Perceptual learning is considered a manifestation of neural plasticity in the adult brain, enabling adaptive responses to environmental changes. Visual perceptual learning (VPL) has been demonstrated in various basic visual dimensions, such as orientation [5-7], contrast [8-10], texture [1,11,12], hyperacuity [13-16] and motion direction [17-21]. VPL often requires thousands of trials of practice over days or weeks, and performance improvement can last for months or even years [9,22-26].

A hallmark of VPL is that learning is typically highly specific to the trained location and feature (e.g. orientation, motion direction) [1,6,14-16,18,19,27,28]. This specificity is typically interpreted as evidence that VPL occurs in early cortical regions [7,29-32], where receptive fields of neurons are selective for these attributes.

The degree of learning specificity, however, depends upon specifics of the experimental procedure; e.g.: length of training [33], difficulty of training stimuli [34,35], inclusion of a pretest [36], whether multiple stimuli are trained [35,37,38], adaptation [11], and deployment of covert spatial attention [5,27,39,40]. For example, a double-training protocol enables transfer of learning to a different location by employing a secondary task [37]. Investigating factors and protocols that influence learning specificity and transfer provides a theoretical framework to infer cortical plasticity underlying VPL. Compared to specificity as a typical training outcome, transfer underscores the potential for translating VPL into a systematic training regime to improve visual skills and rehabilitation. An efficient training regime should promote learning to untrained conditions to maximize training benefits. Thus, understanding when and why training leads to transfer has become a central focus in VPL.

90 Recent research has highlighted the importance of top-down attentional modulation in VPL. The role  
91 of attention – the process by which rich sensory information is selected and prioritized – has been  
92 often discussed [41-44] but rarely manipulated and isolated in VPL. Thus, it is still largely unknown  
93 how attention and VPL interact and whether and how their underlying mechanisms are related.  
94

95 To date, only a few studies have explicitly isolated attentional effects on VPL specificity. Research  
96 in our laboratory has revealed that both exogenous (involuntary) and endogenous (voluntary) spatial  
97 attention [45] during training facilitate transfer of learning to untrained locations [5,27,40]. Of note,  
98 manipulating attention during a single task requires less time and effort than other protocols that  
99 employ a secondary task to induce transfer [37,38,46], and is thus a more efficient training regime.  
100 Therefore, characterizing the effects of distinct types of attention on VPL will inform the development  
101 of efficient training protocols and shed light on how VPL relies on plasticity across different brain  
102 areas.  
103

104 Feature-based attention (FBA), the selective processing of a relevant feature over unattended  
105 features, is notable in terms of its “global” effect. In contrast to spatial attention, which enhances  
106 processing within a spatial focus, behavioral and neuroimaging FBA studies have demonstrated its  
107 location-independent property: FBA is deployed simultaneously throughout the visual field, including  
108 locations that are irrelevant to the observer’s current task [47-58]. There is ample evidence  
109 characterizing FBA effects on visual perception, but it is unknown whether FBA generalizes VPL. To  
110 inform the development of efficient training protocols, and to gain mechanistic insight of VPL, we  
111 investigate whether and to which extent FBA influences the degree of specificity in human VPL.  
112

113 To address this question, first we implemented a novel orientation discrimination task in which  
114 observers were presented with two reference angles simultaneously before each block, then asked  
115 to discriminate whether the orientation of a Gabor stimulus was clockwise or counter-clockwise with  
116 respect to either reference during each trial. In Experiment 1, we confirmed that FBA improves  
117 accuracy in this task.  
118

119 Then we investigated the effects of FBA on location and feature specificity in VPL. In Experiment 2,  
120 two groups of observers participated in a six-day study; the Attention group trained with a feature  
121 attention cue, and the Neutral group trained with a neutral cue. To isolate the effects of training with  
122 FBA on VPL, observers were presented with a neutral cue during both the pre-test (before training)  
123 and post-test (after training) sessions. Because of the global effect of FBA on the attended features,  
124 we hypothesized that observers deploying feature attention during training would overcome  
125 retinotopic specificity, but not orientation specificity, whereas the Neutral group would exhibit both  
126 location and orientation specificity.  
127

128 VPL improvement can last for months or even years [9,22-26]. It is unknown, however, how long the  
129 learning transfer to untrained conditions may last. To assess the duration of our observed VPL  
130 effects, we re-tested the observers 3-4 months, and ~1 year after training. We hypothesized that for  
131 both groups VPL at the trained location and orientation would be long lasting, and investigated  
132 whether any *transfer* effect would be long lasting.  
133

134 Our results show perceptual benefits of FBA on an orientation discrimination task and reveal  
135 remarkable spatial-transfer in the Attention group, whereas the Neutral group exhibited both location  
136 and orientation specificity. Critically, the perceptual improvement attained by both groups and the  
137 location transfer attained by the Attention group were preserved for over a year. The robust and long-  
138 lasting training benefits enabled by FBA imply that it is a useful tool to potentiate the benefits of VPL  
139 by enabling generalization via location transfer. These novel results suggest an interaction between  
140 top-down FBA modulation and processing in visual cortices, thus providing converging evidence that  
141 VPL arises from plasticity across multiple cortical areas [59].

142  
143  
144  
145  
146  
147  
148  
149  
150  
151  
152  
153  
154  
155  
156  
157  
158  
159  
160  
161  
162  
163  
164  
165  
166  
167  
168  
169  
170  
171  
172  
173  
174  
175  
176  
177  
178  
179  
180  
181  
182  
183  
184  
185  
186  
187  
188  
189  
190  
191  
192

## Results

### Perceptual Benefit of FBA

In Experiment 1, we first validated the effects of FBA on an orientation discrimination task (**Fig 1A**). This single-session experiment consisted of 800 trials, half preceded by a neutral cue and the other half by an attentional cue. For each neutral or attentional condition (blocked), there were 4 different conditions (i.e., stimuli on the left or right, and reference orientations of 30°/120° or 60°/150°, which were shown at the beginning of each block, but not during stimulus presentation). To obtain a psychometric function, we had five offsets either clockwise or counter-clockwise (2°, 4°, 6°, 8°, and 10°) from the reference angles.

In the attentional condition, participants were instructed to deploy their FBA to a particular reference orientation indicated by a cue before stimulus presentation (**Fig 1B**). A two-way repeated measures ANOVA was conducted to assess the effects of attention and offset sizes on accuracy. There were significant main effects of attention ( $F(1,17)=4.591$ ,  $p=0.047$ ) and offset size ( $F(4,68)=234.73$ ,  $p<0.001$ ), but no interaction between them ( $F(4,68)=1.253$ ,  $p=0.297$ ). That is, deploying FBA significantly increased discrimination accuracy across different offset sizes compared to the neutral condition (**Fig 1C, upper panel**,  $t_4=3.428$ ,  $p=0.027$ , Cohen's  $d=0.191$ , two-tailed, paired t-test). We analyzed reaction time (RT) as a secondary measure to rule out a possible speed-accuracy trade-off in processing. A two-way repeated measures ANOVA revealed a significant main effect of offset sizes ( $F(4,68)=21.426$ ,  $p<0.001$ ), indicating that observers responded faster at larger offset sizes, when accuracy was higher (**Fig 1C, lower panel**). Although RTs were overall faster in the attention condition than in the neutral condition ( $t_4=3.106$ ,  $p=0.036$ , Cohen's  $d=0.605$ , two-tailed, paired t-test), neither the main effect of attention ( $F(1,17)<1$ ) nor the interaction between attention and offset sizes ( $F(4,68)<1$ ) was significant. In sum, this experiment confirmed that FBA enabled observers to perform more accurately, without any speed-accuracy trade-off, in this orientation discrimination task.

### Spatial-Transfer, but Not Feature-Transfer Induced by FBA in VPL

In Experiment 2, two groups of observers participated in a six-day study (**Figs 2A,B**). The Attention group trained with a feature attention cue, indicating which of the two reference angles was relevant for the discrimination on a trial-by-trial basis; the Neutral group trained with an uninformative neutral cue indicating both reference angles. Observers in both groups were presented with neutral cues during both the pre-test (before training) and post-test (after training) sessions. Given the global effect of FBA on the attended features, we hypothesized that observers in the Attention group would overcome retinotopic specificity but exhibit orientation specificity.

For both Attention and Neutral groups, we employed the method of constant stimuli during the testing (400 trials each) and the training (800 trials each) sessions. Observers' performance was assessed for the five orientation offsets (**Supplementary Figs S1,S2** online), and 75% accuracy threshold was estimated by fitting a power function (for details, see Materials and Methods). Our training protocol was effective, as confirmed by significant learning in the Neutral group (**Fig 3A**, dark blue circles on sessions 1 vs. 6,  $t_8=8.973$ ,  $p<0.001$ , Cohen's  $d=2.880$ , two-tailed, paired t-test). As expected, The Neutral group showed location and orientation specificity: Learning in the orientation discrimination task did not transfer to any of the three untrained conditions (**Fig 3A**,  $p=0.97$ , 0.19 and 0.15 for light blue, light red and dark red circles on sessions 1 vs. 6, respectively, two-tailed, paired t-tests).

193 We next examined whether and how training with FBA affects VPL specificity. As in the Neutral  
194 group, observers in the Attention group showed significant learning in the trained condition (**Fig 3B**,  
195 dark blue circles on sessions 1 vs. 6,  $t_8=6.336$ ,  $p<0.001$ , Cohen's  $d=2.647$ , two-tailed, paired t-test).  
196 The threshold differences between sessions 1 and 6 did not differ significantly between the two  
197 groups ( $t_{16}=1.478$ ,  $p=0.159$ , two-sample t-test), indicating comparable performance improvement in  
198 the trained condition. Likewise, performance in training sessions was similar between groups. A two-  
199 way ANOVA revealed a main effect of training ( $F(3,48)=8.095$ ,  $p<0.001$ ), but no main effect of group  
200 or interaction between training and group ( $F<1$ ). Importantly, unlike in the Neutral group, the Attention  
201 group showed complete learning transfer to the untrained location in the other hemifield (**Fig 3B**,  
202 light red circles on sessions 1 vs. 6,  $t_8=5.225$ ,  $p<0.001$ , Cohen's  $d=1.706$ , two-tailed, paired t-test),  
203 with a comparable magnitude of performance change to the trained condition (**Fig 6B**, dark blue and  
204 light red bars,  $t_8=0.617$ ,  $p=0.555$ , two-tailed, paired t-test). However, learning did not transfer either  
205 to the untrained orientation (**Fig 3B**, light blue circles on sessions 1 vs. 6,  $t_8=-0.784$ ,  $p=0.456$ , two-  
206 tailed, paired t-test) or to the untrained orientation at the untrained location (**Fig 3B**, dark red circles  
207 on sessions 1 vs. 6,  $t_8=0.757$ ,  $p=0.471$ , two-tailed, paired t-test).  
208

209 To further investigate our hypothesis that FBA training induces location transfer, we conducted a  
210 three-way mixed ANOVA with within-subject factors of location (trained vs. untrained) and training  
211 (Pre-test vs. Post-test 1), and a between-subjects factor of group (neutral vs. attention) using  
212 threshold values at the trained orientation (**Fig 4A**). There was a significant main effect of training  
213 ( $F(1,16)=87.621$ ,  $p<0.001$ ), indicating that performance became better at Post-test 1 than at Pre-  
214 test. Critically, there was a significant three-way interaction among location, training and group  
215 ( $F(1,16)=5.437$ ,  $p=0.033$ ). A two-way ANOVA (location x training) for each group revealed that for  
216 the Neutral group, there was a main effect of training ( $F(1,8)=38.355$ ,  $p<0.001$ ), and an interaction  
217 between location and training ( $F(1,8)=7.7284$ ,  $p=0.024$ ), indicating greater learning at the trained  
218 than the untrained location ( $p=0.027$ ). For the Attention group, there was also a main effect of training  
219 ( $F(1,8)=49.512$ ,  $p<0.001$ ), but no interaction between location and training ( $F<1$ ), indicating that the  
220 extent of learning was comparable at both the trained and untrained locations.  
221

222 There was an overall correlation between the pre-training threshold and the degree of improvement  
223 ( $r(80)=0.45$ ,  $p<0.001$ ). Thus we asked, could the pre-training threshold have affected the degree of  
224 transfer [60,61]? A two-way ANOVA revealed a main effect of condition ( $F(3,54)=3.022$ ,  $p=0.037$ ),  
225 but no main effect of group ( $F(1,18)=0.291$ ,  $p=0.597$ ) or interaction between condition and group  
226 ( $F(3,54)=1.853$ ,  $p=0.148$ ) on the Pre-test in the initial dataset (20 observers; Supplementary **Fig S3**).  
227 Despite no statistical significance, to prevent any possible confound due to a difference of the pre-  
228 training threshold for the trained orientation at the untrained location, we equated the pre-training  
229 thresholds in this condition by removing the observer with the lowest threshold in the Neutral group  
230 and the observer with the highest threshold in the Attention group; again, there was no significant  
231 difference between the two groups (**Fig 4A**,  $t_{16}=1.244$ ,  $p=0.232$ , two-sample t-test). Moreover, the  
232 pattern of results was the same when removing two observers from each group to further equate the  
233 threshold (Supplementary **Fig S4**): There was location transfer in the Attention group but not in the  
234 Neutral group.  
235

236 We also conducted similar three-way mixed ANOVA to assess learning at the untrained  
237 orientation/trained location (**Fig 4B**), and at the untrained orientation/untrained location (**Fig 4C**). For  
238 each condition, there was a main effect of training (**Fig 4B**,  $F(1,16)=14.097$ ,  $p=0.002$ ; **Fig 4C**,  
239  $F(1,16)=42.181$ ,  $p<0.001$ ), and a two-way interaction between condition and training (**Fig 4B**,  
240  $F(1,16)=35.851$ ,  $p<0.001$ ; **Fig 4C**,  $F(1,16)=22.509$ ,  $p<0.001$ ), but no three-way interaction among  
241 condition, training and group (**Fig 4B**,  $F<1$ ; **Fig 4C**,  $F<1$ ). Therefore, learning did not differ between  
242 groups for these two untrained conditions. In sum, these results support our hypothesis that training  
243 with FBA unlocks location specificity, while preserving orientation specificity in VPL.  
244

245  
246  
247  
248  
249  
250  
251  
252  
253  
254  
255  
256  
257  
258  
259  
260  
261  
262  
263  
264  
265  
266  
267  
268  
269  
270  
271  
272  
273  
274  
275  
276  
277  
278  
279  
280  
281  
282  
283  
284  
285  
286  
287  
288  
289  
290  
291  
292  
293  
294  
295  
296

## Long-Term Retention of VPL Improvement and Transfer

Whereas it is well known that location transfer can be attained under certain experimental conditions [5,35,37,38,40] and that VPL improvement can last for months or even years [9,22-26], it is unknown how long learning transfer can last. To assess the duration of the observed VPL effects, we conducted a follow-up experiment. All 18 observers who completed the VPL training were recruited back 3-4 months after their Post-test 1 ( $M=107.5$  days,  $SD=26.3$  days), and completed the same testing session, which we refer to as Post-test 2.

In Post-test 2, learning of the orientation discrimination in the Neutral group (re-tested  $112 \pm 18$  days after Post-test 1) remained robust in the trained condition (**Fig 3A**, dark blue circles on sessions 1 vs. 7,  $t_8=5.947$ ,  $p<0.001$ , Cohen's  $d=1.772$ , two-tailed, paired t-test). Moreover, the Neutral group retained both location and orientation specificity (**Fig 3A**,  $p=0.81$ , 0.13 and 0.06 for light blue, light red, and dark red circles on sessions 1 vs. 7, respectively). Critically, for the Attention group (re-tested  $103 \pm 33$  days after Post-test 1) not only the improvement remained at the trained condition (**Fig 3B**, dark blue circles on sessions 1 vs. 7,  $t_8=4.593$ ,  $p=0.002$ , Cohen's  $d=1.841$ , two-tailed, paired t-test), but also at the transferred location (**Fig 3B**, light red circles on sessions 1 vs. 7,  $t_8=4.301$ ,  $p=0.003$ , Cohen's  $d=1.654$ , two-tailed, paired t-test). We note that although performance for the untrained orientation at the untrained location in the Attention group seemed to improve from Post-test 1 to Post-test 2, this improvement did not reach significance and performance at Post-test 2 does not significantly differ from its Pre-test (dark red circles on sessions 1 vs. 7,  $t_8=1.645$ ,  $p=0.139$ ).

To assess the training effects in a longer time scale, we conducted Post-test 3 one year after completion of training (**Fig 5**). Six observers in the Neutral group and 5 observers in the Attention group participated in Post-test 3, which took place  $414 \pm 34$  days after their Post-test 1 (due to the COVID-19 pandemic, we were not able to recruit all observers back). Despite a long period of time, learning in the Neutral group (re-tested  $408 \pm 38$  days after Post-test 1) remained significant in the trained condition (**Fig 5A**, dark blue circles on sessions 1 vs. 8,  $t_5=3.497$ ,  $p=0.009$ , Cohen's  $d=1.174$ , one-tailed, paired t-test), but did not transfer to the three untrained conditions (**Fig 5A**,  $p=0.40$ , 0.28 and 0.26 for light blue, light red, and dark red circles on sessions 1 vs. 8, respectively; 1 of the 6 observers in the Neutral group lost improvement in Post-test 3). The Attention group (re-tested  $420 \pm 31$  days after Post-test 1) retained learning at the trained condition (**Fig 5B**, dark blue circles on sessions 1 vs. 8,  $t_4=3.02$ ,  $p=0.02$ , Cohen's  $d=1.993$ , one-tailed, paired t-test), as well as location transfer (**Fig 5B**, light red circles on sessions 1 vs. 8,  $t_4=2.377$ ,  $p=0.038$ , Cohen's  $d=1.455$ , one-tailed, paired t-test). These results support our hypothesis that not only the improvement gained in both groups, but also the transfer induced in the Attention group is long lasting, up to over a year after training. We note that although performance for the untrained orientation at the trained location in the Attention group improved from Post-test 2 to Post-test 3, performance at Post-test 3 still does not significantly differ from its Pre-test (light blue circles on sessions 1 vs. 8,  $t_4=0.518$ ,  $p=0.632$ ).

We calculated observers' Mean Percent Improvement (MPI) to analyze the magnitude of performance changes between the Neutral and Attention groups for individual conditions, and none of the comparisons was significant ( $p>0.05$ ). To further compare performance changes at the post-tests between the groups, observers' MPI was assessed between Pre-test versus Post-test 1, Pre-test versus Post-test 2 and Pre-test versus Post-test 3 (**Fig 6**). In Post-test 1, the Neutral group exhibited significant improvement,  $MPI= 63.2 \pm 10.7\%$  only at the trained condition (**Fig 6A**, dark blue bar,  $t_8=20.035$ ,  $p<0.001$ , Cohen's  $d=9.444$ ; light red bar= $20.3 \pm 9.1\%$ ,  $t_8=1.279$ ,  $p=0.237$ ; light blue bar= $-14.1 \pm 13.7\%$ ,  $t_8= -0.684$ ,  $p=0.514$ ; and dark red bar= $21.5 \pm 8.6\%$ ,  $t_8=1.716$ ,  $p=0.125$ , two-tailed, paired t-tests). The Attention group exhibited significant, comparable amount of improvement

297 both in the trained condition and at the untrained location for the trained orientation (**Fig 6B**, dark  
298 blue bar= $51.1 \pm 10.9\%$ ,  $t_8=8.273$ ,  $p<0.001$ , Cohen's  $d=3.9$ ; light red bar= $45.3 \pm 12.3\%$ ,  $t_8=7.112$ ,  
299  $p<0.001$ , Cohen's  $d=3.353$ , two-tailed, paired t-tests). Such transfer did not occur either at the  
300 untrained orientation for the trained location (**Fig 6B**, light blue bar= $-37.2 \pm 22.5\%$ ,  $t_8= -0.564$ ,  
301  $p=0.266$ ), or at the untrained orientation and untrained location (**Fig 6B**, dark red bar= $-4.9 \pm 15.1\%$ ,  
302  $t_8= -0.105$ ,  $p=0.829$ ).

303  
304 In Post-test 2, learning at the trained condition remained for both groups (**Figs 6C**, dark blue  
305 bar= $44.8 \pm 10.5\%$ ,  $t_8=6.425$ ,  $p<0.001$ , Cohen's  $d=3.029$ ; **6D**, dark blue bar= $36.5 \pm 6.5\%$ ,  $t_8=4.312$ ,  
306  $p=0.001$ , Cohen's  $d=2.033$ , one-tailed, paired t-tests). Importantly, in the Attention group, the  
307 improvement was retained at the untrained location for the trained orientation (**Fig 6D**, light red  
308 bar= $37.2 \pm 8.1\%$ ,  $t_8=4.47$ ,  $p=0.001$ , Cohen's  $d=2.107$ ). Although the amount of improvement  
309 decreased slightly from Post-test 1 to Post-test 2 (**Figs 3A,B**, dark blue circles on sessions 6 and 7;  
310 **Fig 6**, dark blue bars in **A,B** vs. **C,D**), the pattern remained: training with FBA induced complete  
311 location transfer both in Post-test 1 and Post-test 2 (**Figs 6B,D**).

312  
313 In Post-test 3, both groups still retained improvement at the trained condition (**Figs 6E**, dark blue  
314 bar= $41.2 \pm 9.0\%$ ,  $t_5=3.859$ ,  $p=0.006$ , Cohen's  $d=2.223$ ; **6F**, dark blue bar= $43.8 \pm 5.4\%$ ,  $t_4=4.27$ ,  
315  $p=0.006$ , Cohen's  $d=2.707$ , one-tailed, paired t-test). Furthermore, in the Attention group learning  
316 transfer to the untrained location remained (**Fig 6F**, light red bar= $37.1 \pm 14.9\%$ ,  $t_4=2.302$ ,  $p=0.041$ ,  
317 Cohen's  $d=1.456$ , one-tailed, paired t-test). There was no transfer in the other untrained conditions  
318 in either the Neutral group (**Fig 6E**,  $t_5=0.732$ ,  $p=0.497$  for light red bar,  $t_5=0.676$ ,  $p=0.529$  for light  
319 blue bar and  $t_5=1.132$ ,  $p=0.309$  for dark red bar) or the Attention group (**Fig 6F**,  $t_4= -0.178$ ,  $p=0.868$   
320 for light blue bar and  $t_4=0.362$ ,  $p=0.736$  for dark red bar).

321  
322 Taken together, our results show a perceptual benefit of FBA on an orientation discrimination task  
323 and reveal a remarkable spatial-transfer of learning induced by FBA. Moreover, the perceptual  
324 improvements in the trained condition in both groups and the learning transfer to an untrained  
325 location in the Attention group were preserved for over a year, indicating robust, long-term benefits  
326 of training with FBA in VPL.

327  
328

## 329 Discussion

330  
331 This study reveals how training with FBA benefits human VPL. We first confirmed that FBA improved  
332 accuracy in an orientation discrimination task. Next, manipulating FBA during training induced  
333 spatial-transfer, but not feature-transfer, in VPL. Our findings that FBA unlocks location specificity,  
334 while preserving feature specificity, are consonant with the psychophysical and neural evidence  
335 showing that FBA effects are independent of the location of the attended stimuli [47-58], and expand  
336 our understanding of FBA's global modulation from human visual perception to VPL. Critically, the  
337 perceptual improvements and generalization gained from our training protocol persisted for over a  
338 year, revealing that FBA induces long-term benefits.

339  
340 It has been established that VPL transfer is related to particular training protocols [33,35-  
341 38,46,60,61]. Its presence and degree is influenced by numerous experimental factors, including  
342 length of training [33], stimulus precision [35,60], variability of training stimuli [61], initial threshold  
343 and the amount of learning [62,63]. Retinotopic specificity is preserved with high stimulus precision  
344 during training [35] or in a transfer task [60]. We note that in the present study we controlled for the  
345 amount of training, stimuli precision and variability (using the method of constant stimuli, with 5 levels  
346 of orientation offset) and equated the initial thresholds of the trained condition between the Neutral  
347 and Attention groups. Although the method of constant stimuli, due to stimulus variability, could lead  
348 to transfer, we found location and orientation specificity in the Neutral group. Furthermore, it is likely

349 that the internal representation of the reference orientations becomes less noisy throughout training  
350 [64], but such effect would have been the same at the trained and untrained locations/orientations.  
351 Therefore, our training procedure in the two groups could have not been differentially subjected to  
352 any of the aforementioned factors that can impact VPL specificity. Moreover, our experimental design  
353 ensured that FBA deployment during training was the critical influence determining robust location  
354 transfer. The cues only differed during the training days for the Neutral and Attention groups, but  
355 both groups performed the pre- and post-test sessions with a neutral cue. Analogous designs have  
356 been used to manipulate and isolate the role of covert spatial attention in learning acquisition [39]  
357 and in location transfer [5,27,40].

358  
359 In addition to the remarkable location-transfer induced by FBA, we also observed a slight (not  
360 statistically significant) suppression in performance at the untrained features in the Attention group  
361 (**Figs 6B,D**, light blue bars). This observation is consistent with studies showing FBA enhancement  
362 of the target and suppression of nearby features [65-68]. The 'feature-similarity gain model' highlights  
363 the similarity between the attended features and the neurons' preferred features. Enhancement  
364 takes place when the attended stimulus matches the neurons' preference, and suppression when  
365 the attended feature is dissimilar to the neurons' preferred feature [52,69].

366  
367 Regarding the neural basis underlying the behavioral improvement in orientation discrimination  
368 tasks, it has been shown that training alters the tuning profiles of populations of orientation-selective  
369 neurons in the visual cortex [7,70,71]. A monkey single-unit recording study reported that orientation  
370 learning led to an increase in neuronal selectivity in V1, with steeper tuning functions for the neurons  
371 most sensitive to the trained orientation [7]. Likewise, a human fMRI study revealed that extensive  
372 training can refine neural representations in the occipital cortex (V1-V4), even in the absence of  
373 gross changes of BOLD responses after training [70]. The training-induced changes manifested as  
374 specifically enhanced neural representation of the trained orientation at the trained location, in  
375 agreement with specificity of perceptual learning in their behavioral task.

376  
377 What mechanism could drive location transfer induced by FBA in VPL? Reweighting models have  
378 been proposed to account for specificity and transfer in VPL [72-75]. To explain transfer across  
379 retinotopic locations, the Integrated Reweighting Theory builds a multi-level learning system that  
380 incorporates higher-level, location-independent representations with lower-level, location-specific  
381 representations, which are both dynamically modified in VPL [74]. The performance improvement  
382 results from pruning weights on untrained orientations, and amplifying weights on relevant, trained  
383 orientations to the decision unit [76,77]. Whereas location transfer is mediated by reweighting the  
384 broadly tuned location-independent representations, specificity arises from reweighting the narrowly  
385 tuned location-specific representations [74]. At the performance level, FBA improves visual  
386 perception in a way consistent with boosting the gain and sharpening the tuning of neuronal  
387 population responses to the attended features [78,79], consistent with neurophysiological [69] and  
388 neuroimaging [70,80] findings. At the learning level, deploying FBA during perceptual training is likely  
389 to shape the neural circuits through increasing the weights between location-independent  
390 representations and the decision unit, thus mediating location transfer in VPL.

391  
392 Spatial attention also facilitates location transfer in VPL [5,27,40]. However, the mechanisms  
393 underlying this transfer, which seems counter-intuitive to the localized effect of spatial attention,  
394 remain unclear. It has been speculated that the short-term improvement of sensory signals due to  
395 spatial attention may enable a higher level learning mechanism [5,27,40]. The Reverse Hierarchy  
396 Theory [37,86] predicts specificity in difficult tasks in which training modifies low-level, location- and  
397 feature-specific units, and transfer in easy tasks in which training-induced modifications are at high-  
398 level, broadly-tuned units. Accordingly, because covert spatial attention enhances sensory  
399 processing and improves performance [45,81], making tasks less difficult, learning may rely more on  
400 high-level units and facilitate transfer. Given that the stimulus parameters, task and training days of



401 the current study differ from those of spatial attention, it is not possible to directly compare their  
402 transfer effects. Future research with a constant experimental design is required to compare the  
403 degree of location transfer induced by spatial attention and FBA.  
404

405 Elucidating the mechanisms underlying specificity and transfer has become a central focus of the  
406 VPL field. There is substantial evidence supporting that specificity reflects plasticity in low-level brain  
407 areas [7,29-32], but learning-related neuronal changes are not only confined to the primary sensory  
408 areas [71,82-84]. Research indicating that specific learning effects can arise from top-down  
409 influences [85-87], or can be accomplished by changes of readout weights in decision areas,  
410 highlight the importance of higher-level brain areas involved in VPL [73,74,76,77]. These studies, as  
411 well as the current findings, suggest that VPL involves low-level representations, higher level  
412 representations, read-out, attention, and decisions [88], and that changes in one or multiple brain  
413 systems could determine the degree of behavioral learning transfer.  
414

415 Findings from VPL studies have translational implications for improving visual expertise and clinical  
416 rehabilitation. To promote VPL generalization, researchers must develop efficient protocols that  
417 overcome specificity to maximize training benefits. The present study provides an important step in  
418 optimizing visual training protocols to promote learning generalization, which could have translational  
419 value for developing training tools. The effectiveness of FBA training with a special population  
420 provides converging evidence for the usefulness and potential of this approach. A recent study has  
421 shown that cortically blind patients who trained with FBA could restore performance in a fine-direction  
422 discrimination task, whereas those patients who trained without FBA could not [89].  
423

424 To conclude, we have implemented an elegant, well-controlled design to assess whether and to  
425 which extent FBA affects the degree of location and feature specificity, which are hallmarks of VPL.  
426 The pronounced, long-lasting training benefits we observed reveal FBA as an effective tool to  
427 generalize learning across locations over a long time scale. Furthermore, these findings can inform  
428 models and theories that link visual learning to plasticity across multiple cortical areas and can shed  
429 light on our understanding of the underlying neural mechanisms of attention-induced transfer in  
430 human learning.  
431

432  
433

## 434 **Materials and methods**

435

### 436 **Observers**

437

438 Eighteen (12 females; mean=26.6 ± 6.4 years old) and other 20 (13 females; mean=23.6 ± 4.6 years  
439 old) human observers who had normal or corrected-to-normal vision participated in Experiments 1  
440 and 2, respectively. In Experiment 1, we did not include people whose data quality fell below our  
441 criteria (overall 75% accuracy). In Experiment 2, one observer was excluded from each group for  
442 analysis to equate pre-training thresholds for the untrained location, trained orientation condition  
443 across groups. We note that all reported results are the same when we take all 10 observers per group  
444 into account (Supplementary **Fig S3**), or remove two from each group for a further threshold equation  
445 (Supplementary **Fig S4**). The 18 remaining naïve observers were equally distributed into two groups  
446 – Neutral (5 females; mean= 21.2 ± 1.8 years old) or Attention (7 females; mean= 24.0 ± 4.6 years  
447 old). The experimental protocols were approved by the University Committee on Activities Involving  
448 Human Subjects of New York University, and all research was performed in accordance with relevant  
449 guidelines/regulations. Informed consent was obtained from all observers.  
450

### 451 **Apparatus**

452

453 The stimuli were presented using Psychophysics Toolbox [90,91] for MATLAB (The MathWorks,  
454 Natick, MA) on an iMac computer with a 21" gamma-corrected Sony GDM-5402 CRT monitor with  
455 resolution of 1280 x 960 pixels and a refresh rate of 100Hz. An infrared eye tracker system Eyelink  
456 1000 (SR research, Kanata, Ontario, Canada) and a chin rest and head rest were used to ensure  
457 eye fixation at the center of the display throughout each trial in the experimental sessions. The  
458 viewing distance was 57 cm, and all experiments were performed with a gaze-contingent display in  
459 which the eye-tracker enabled new trials to start only once observers had fixated at the center (within  
460 a 2° radius fixation window). If an eye-movement outside of this window was detected at any point  
461 after the trial started, then that trial was aborted and added to the end of each block (~5% of the  
462 trials).

## 463 464 **Stimuli**

466 In each trial, the stimulus was a single Gabor patch (Gaussian windowed sinusoidal gratings)  
467 subtending 2° of visual angle and presented at 5° eccentricity on a grey background. The Gabor had  
468 spatial frequency of 4 cpd, standard deviation of  $2\lambda$ , and contrast of 0.64. To assess five different  
469 difficulty levels, there were five offsets (2°, 4°, 6°, 8°, and 10°) that were either clockwise or counter-  
470 clockwise from reference angles. We used four reference orientations, which indexed different  
471 features in this task, and at the beginning of each block two of the references (either reference  
472 combination 1 of 30°/120°, or combination 2 of 60°/150°) were presented simultaneously (**Fig 1A**).  
473 The neutral cue consisted of a pair of leftward and rightward arrowheads flanking the fixation dot,  
474 each starting 0.6° from the fixation point and composed of two 0.5°-long x 0.12°-wide black lines 92°  
475 apart. The attentional cue was either a leftward arrowhead indicating a reference angle of 30° or 60°,  
476 or a rightward arrowhead indicating 120° or 150°, depending on the reference combination for that  
477 block (**Fig 1B**). For all blocks in Experiment 1, and the testing sessions of Experiment 2, the feedback  
478 was a 1°-long x 0.06°-wide line on top of a white fixation dot (radius 0.15°) presented at the reference  
479 angle of the just-perceived stimulus, to remind observers of the exact reference orientations. For all  
480 training sessions of Experiment 2, the feedback was given at the fixation dot indicating trial accuracy.

## 481 482 **Orientation discrimination task**

484 Each trial began with a 400-ms fixation period followed by a 200-ms neutral or attentional cue (**Fig**  
485 **1A**). After a 400-ms ISI, the stimulus was presented for a single 200-ms interval, and the observer's  
486 task was to judge whether the orientation of the stimulus was clockwise or counter-clockwise to the  
487 closest reference orientation by pressing labeled keys "/" or "\" on the keyboard, respectively. The  
488 temporal parameters ensured that observers had time to deploy FBA [48]. Two reference lines were  
489 shown to observers before each block, but never appeared on the screen during stimulus  
490 presentation, so observers were encouraged to use their internal representation of the reference  
491 orientations to perform the discrimination. Observers had 4 s to indicate their answer by a key-press,  
492 and then received a 300-ms feedback line flashing green for correct responses, or red for incorrect  
493 responses. There was a 1-s inter-trial interval.

## 494 495 **Practice**

497 In Experiments 1 and 2, observers performed 4 practice blocks (20 trials each) of the orientation  
498 task, with reference combinations (30°/120° or 60°/150°) and locations (left or right) counterbalanced  
499 and a 10° offset between targets and references. The criterion was 70% accuracy before proceeding  
500 to the main task. Additionally, on day 1 of Experiment 2, observers completed 40 trials of a simple  
501 color-discrimination task before the orientation practice, to familiarize themselves with the procedure  
502 and timing, and to reduce procedural learning during the perceptual learning experiment.

## 503 504 **Experiment 1**

505  
506  
507  
508  
509  
510  
511  
512  
513  
514  
515  
516  
517  
518  
519  
520  
521  
522  
523  
524  
525  
526  
527  
528  
529  
530  
531  
532  
533  
534  
535  
536  
537  
538  
539  
540  
541  
542  
543  
544  
545  
546  
547  
548  
549  
550  
551  
552  
553  
554  
555  
556

This experiment consisted of a single session of the orientation discrimination task. Observers performed 800 trials, equally distributed in four 200-trial sections that corresponded to either a neutral (N) or an attentional (A) cue. The four sections were administered in N-A-N-A or A-N-A-N counterbalanced order. The 200 trials in each section were divided into 4 blocks, each corresponding to a different condition (i.e., stimuli on the left or right, and reference orientations of 30°/120° or 60°/150°), and 50 trials (5 repetitions of each the 5 offset-sizes, and each of the two reference angles) were randomized per block. To use the attentional cue, participants were instructed to deploy their attention to a particular feature (a reference orientation) indicated by the cue before the stimulus presentation (**Fig 1B**). Given the nature of simultaneous features in our design, and that no explicit reference was shown during orientation discrimination, this task was difficult even for experienced observers.

## Experiment 2

This was a six-day perceptual learning experiment. Observers were tested at 5° eccentricity on left or right horizontal meridian for each of the reference combinations –30°/120° or 60°/150°– on their first and sixth days and completed 4 training sessions on days 2-5 (**Figs 2A,B**). All 6 sessions were performed at the same or a similar time across the average time frame of 7.4 days (SD = 0.9 day), with ≤ 2 days between consecutive sessions.

The testing sessions consisted of 400 trials, all presented with a neutral cue, equally distributed between four different conditions (i.e., stimuli on the left or right, and reference orientations of 30°/120° or 60°/150° counterbalanced across observers; **Fig 2A**). Each of the 4 conditions contained two blocks of 50 trials (5 trials per offset size and reference angle). The order of the eight blocks was randomized. During the training sessions, observers performed one condition for 800 trials, with 400 trials for each reference orientation, with a neutral or attentional cue depending on the group assignment. The 800 trials were split into 16 blocks of 50 trials (5 trials per offset size and reference angle), with short breaks between blocks and a 5-min break in the middle of the session. In addition, to assess how long the training effects would last, all observers from the two groups were recruited back 3-4 months after completion of the six-day experiment and asked to perform the same testing session (i.e., Post-test 2; **Fig 2B**). Moreover, 6 observers from the Neutral group and 5 observers from the Attention group were re-tested 1 year after completion of the six-day experiment (i.e., Post-test 3; **Fig 2B**). Due to the COVID-19 pandemic, we could not recruit the rest of the observers.

## Data analysis

Performance in the orientation discrimination task was measured using the method of constant stimuli (across five orientation offsets). Mean observer performance was plotted as psychometric curves across five orientation offsets, then fitted by a power function with  $R^2$  to indicate the quality of fit (**Figs 1C,S1,S2**).

Threshold in the VPL study was estimated by a power function ( $f(x) = ax^n$ , where  $a$  is a constant and  $n$  is a real number) where observers achieved 75% accuracy.

In Experiments 1 and 2, repeated measures ANOVAs were performed in MATLAB to assess statistical significance. A two-way ANOVA was conducted to assess the effects of attention and orientation offsets on accuracy in Experiment 1. For Experiment 2, we conducted a three-way ANOVA with within-subject factors of condition (trained vs. untrained) and training (Pre-test vs. Post-test 1), and a between-subjects factor of group (neutral vs. attention) using threshold values to examine potential interactions between the two groups. When a three-way interaction was found, a two-way ANOVA (condition x training) was conducted to assess the threshold changes after learning

557 for each group (**Fig 4**). Paired t-tests were used to assess the threshold changes before and after  
558 training for each condition (**Figs 3,4,5**), and the performance changes for conditions within each  
559 group (**Fig 6**). The performance changes at post-tests were calculated as  $(\text{Threshold}_{\text{pre}} -$   
560  $\text{Threshold}_{\text{post}}) / \text{Threshold}_{\text{pre}}$  for each observer and represented as Mean Percent Improvement  
561 (MPI) in **Fig 6**. Error bars in all figures represent  $\pm 1$  within-subject SEM [92], which takes into account  
562 individual variability by subtracting the group mean from each individual's value.  
563  
564

565 **Acknowledgements:** This research was supported by National Eye Institute EY016200 and  
566 EY027401 to MC. We thank members of the Carrasco Lab for their helpful comments.  
567

568 **Author contributions:** S.-C.H. and M.C. conceived and designed the experiments. S.-C.H.  
569 performed the experiments and analyzed data. S.-C.H. and M.C. wrote the paper.  
570

571 **Competing interests:** The authors declare that no competing interests exist.  
572

573 **REFERENCES**

- 574
- 575 1. Karni, A., and Sagi, D. (1991). Where practice makes perfect in texture discrimination:  
576 evidence for primary visual cortex plasticity. *Proc Natl Acad Sci U S A* 88, 4966-4970.
  - 577 2. Wright, B.A., Buonomano, D.V., Mahncke, H.W., and Merzenich, M.M. (1997). Learning and  
578 generalization of auditory temporal-interval discrimination in humans. *J Neurosci* 17, 3956-  
579 3963.
  - 580 3. Dinse, H.R., Ragert, P., Pleger, B., Schwenkreis, P., and Tegenthoff, M. (2003).  
581 Pharmacological modulation of perceptual learning and associated cortical reorganization.  
582 *Science* 301, 91-94.
  - 583 4. Chu, M.W., Li, W.L., and Komiyama, T. (2016). Balancing the Robustness and Efficiency of  
584 Odor Representations during Learning. *Neuron* 92, 174-186.
  - 585 5. Donovan, I., Szpiro, S., and Carrasco, M. (2015). Exogenous attention facilitates location  
586 transfer of perceptual learning. *J Vis* 15, 11.
  - 587 6. Schoups, A.A., Vogels, R., and Orban, G.A. (1995). Human perceptual learning in identifying  
588 the oblique orientation: retinotopy, orientation specificity and monocularly. *J Physiol* 483 ( Pt  
589 3), 797-810.
  - 590 7. Schoups, A.A., Vogels, R., Qian, N., and Orban, G. (2001). Practising orientation  
591 identification improves orientation coding in V1 neurons. *Nature* 412, 549-553.
  - 592 8. Yu, Q., Zhang, P., Qiu, J., and Fang, F. (2016). Perceptual Learning of Contrast Detection in  
593 the Human Lateral Geniculate Nucleus. *Curr Biol* 26, 3176-3182.
  - 594 9. Adini, Y., Sagi, D., and Tsodyks, M. (2002). Context-enabled learning in the human visual  
595 system. *Nature* 415, 790-793.
  - 596 10. Sowden, P.T., Rose, D., and Davies, I.R. (2002). Perceptual learning of luminance contrast  
597 detection: specific for spatial frequency and retinal location but not orientation. *Vision Res*  
598 42, 1249-1258.
  - 599 11. Harris, H., Gliksberg, M., and Sagi, D. (2012). Generalized perceptual learning in the absence  
600 of sensory adaptation. *Curr Biol* 22, 1813-1817.
  - 601 12. Ahissar, M., and Hochstein, S. (1993). Attentional control of early perceptual learning. *Proc*  
602 *Natl Acad Sci U S A* 90, 5718-5722.
  - 603 13. Sotiropoulos, G., Seitz, A.R., and Series, P. (2011). Perceptual learning in visual hyperacuity:  
604 A reweighting model. *Vision Res* 51, 585-599.
  - 605 14. Poggio, T., Fahle, M., and Edelman, S. (1992). Fast perceptual learning in visual hyperacuity.  
606 *Science* 256, 1018-1021.
  - 607 15. Crist, R.E., Kapadia, M.K., Westheimer, G., and Gilbert, C.D. (1997). Perceptual learning of  
608 spatial localization: specificity for orientation, position, and context. *J Neurophysiol* 78, 2889-  
609 2894.
  - 610 16. Seitz, A.R., Yamagishi, N., Werner, B., Goda, N., Kawato, M., and Watanabe, T. (2005).  
611 Task-specific disruption of perceptual learning. *Proc Natl Acad Sci U S A* 102, 14895-14900.
  - 612 17. Zhang, J.Y., and Yang, Y.X. (2014). Perceptual learning of motion direction discrimination  
613 transfers to an opposite direction with TPE training. *Vision Res* 99, 93-98.
  - 614 18. Liang, J., Zhou, Y., Fahle, M., and Liu, Z. (2015). Specificity of motion discrimination learning  
615 even with double training and staircase. *J Vis* 15, 3.
  - 616 19. Ball, K., and Sekuler, R. (1982). A specific and enduring improvement in visual motion  
617 discrimination. *Science* 218, 697-698.
  - 618 20. Watanabe, T., Nanez, J.E., Sr., Koyama, S., Mukai, I., Liederman, J., and Sasaki, Y. (2002).  
619 Greater plasticity in lower-level than higher-level visual motion processing in a passive  
620 perceptual learning task. *Nat Neurosci* 5, 1003-1009.
  - 621 21. Lu, Z.L., Chu, W., Doshier, B.A., and Lee, S. (2005). Independent perceptual learning in  
622 monocular and binocular motion systems. *Proc Natl Acad Sci U S A* 102, 5624-5629.
  - 623 22. Yashar, A., and Carrasco, M. (2016). Rapid and long-lasting learning of feature binding.  
624 *Cognition* 154, 130-138.

- 625 23. Yashar, A., Chen, J., and Carrasco, M. (2015). Rapid and long-lasting reduction of crowding  
626 through training. *J Vis* 15, 15.
- 627 24. Qu, Z., Song, Y., and Ding, Y. (2010). ERP evidence for distinct mechanisms of fast and slow  
628 visual perceptual learning. *Neuropsychologia* 48, 1869-1874.
- 629 25. Molloy, K., Moore, D.R., Sohoglu, E., and Amitay, S. (2012). Less is more: latent learning is  
630 maximized by shorter training sessions in auditory perceptual learning. *PLoS One* 7, e36929.
- 631 26. Karni, A., and Sagi, D. (1993). The time course of learning a visual skill. *Nature* 365, 250-  
632 252.
- 633 27. Donovan, I., Shen, A., Tortarolo, C., Barbot, A., and Carrasco, M. (2020). Exogenous  
634 attention facilitates perceptual learning in visual acuity to untrained stimulus locations and  
635 features. *J Vis* 20, 18.
- 636 28. Fahle, M., Edelman, S., and Poggio, T. (1995). Fast perceptual learning in hyperacuity. *Vision*  
637 *Res* 35, 3003-3013.
- 638 29. Schwartz, S., Maquet, P., and Frith, C. (2002). Neural correlates of perceptual learning: a  
639 functional MRI study of visual texture discrimination. *Proc Natl Acad Sci U S A* 99, 17137-  
640 17142.
- 641 30. Carmel, D., and Carrasco, M. (2008). Perceptual learning and dynamic changes in primary  
642 visual cortex. *Neuron* 57, 799-801.
- 643 31. Yotsumoto, Y., Watanabe, T., and Sasaki, Y. (2008). Different dynamics of performance and  
644 brain activation in the time course of perceptual learning. *Neuron* 57, 827-833.
- 645 32. Furmanski, C.S., Schluppeck, D., and Engel, S.A. (2004). Learning strengthens the response  
646 of primary visual cortex to simple patterns. *Curr Biol* 14, 573-578.
- 647 33. Jeter, P.E., Doshier, B.A., Liu, S.H., and Lu, Z.L. (2010). Specificity of perceptual learning  
648 increases with increased training. *Vision Res* 50, 1928-1940.
- 649 34. Ahissar, M., and Hochstein, S. (1997). Task difficulty and the specificity of perceptual  
650 learning. *Nature* 387, 401-406.
- 651 35. Hung, S.C., and Seitz, A.R. (2014). Prolonged training at threshold promotes robust  
652 retinotopic specificity in perceptual learning. *J Neurosci* 34, 8423-8431.
- 653 36. Zhang, T., Xiao, L.Q., Klein, S.A., Levi, D.M., and Yu, C. (2010). Decoupling location  
654 specificity from perceptual learning of orientation discrimination. *Vision Res* 50, 368-374.
- 655 37. Xiao, L.Q., Zhang, J.Y., Wang, R., Klein, S.A., Levi, D.M., and Yu, C. (2008). Complete  
656 transfer of perceptual learning across retinal locations enabled by double training. *Curr Biol*  
657 18, 1922-1926.
- 658 38. Wang, R., Zhang, J.Y., Klein, S.A., Levi, D.M., and Yu, C. (2014). Vernier perceptual learning  
659 transfers to completely untrained retinal locations after double training: a "piggybacking"  
660 effect. *J Vis* 14, 12.
- 661 39. Szpiro, S.F., and Carrasco, M. (2015). Exogenous Attention Enables Perceptual Learning.  
662 *Psychol Sci* 26, 1854-1862.
- 663 40. Donovan, I., and Carrasco, M. (2018). Endogenous spatial attention during perceptual  
664 learning facilitates location transfer. *J Vis* 18, 7.
- 665 41. Ahissar, M., and Hochstein, S. (2004). The reverse hierarchy theory of visual perceptual  
666 learning. *Trends Cogn Sci* 8, 457-464.
- 667 42. Li, W., Piech, V., and Gilbert, C.D. (2004). Perceptual learning and top-down influences in  
668 primary visual cortex. *Nat Neurosci* 7, 651-657.
- 669 43. Tsushima, Y., and Watanabe, T. (2009). Roles of attention in perceptual learning from  
670 perspectives of psychophysics and animal learning. *Learn Behav* 37, 126-132.
- 671 44. Roelfsema, P.R., van Ooyen, A., and Watanabe, T. (2010). Perceptual learning rules based  
672 on reinforcers and attention. *Trends Cogn Sci* 14, 64-71.
- 673 45. Carrasco, M. (2011). Visual attention: the past 25 years. *Vision Res* 51, 1484-1525.
- 674 46. Zhang, J.Y., Zhang, G.L., Xiao, L.Q., Klein, S.A., Levi, D.M., and Yu, C. (2010). Rule-based  
675 learning explains visual perceptual learning and its specificity and transfer. *J Neurosci* 30,  
676 12323-12328.

- 677 47. White, A.L., Rolfs, M., and Carrasco, M. (2013). Adaptive deployment of spatial and feature-  
678 based attention before saccades. *Vision Res* 85, 26-35.
- 679 48. Liu, T., Stevens, S.T., and Carrasco, M. (2007). Comparing the time course and efficacy of  
680 spatial and feature-based attention. *Vision Res* 47, 108-113.
- 681 49. Maunsell, J.H., and Treue, S. (2006). Feature-based attention in visual cortex. *Trends*  
682 *Neurosci* 29, 317-322.
- 683 50. Saenz, M., Buracas, G.T., and Boynton, G.M. (2003). Global feature-based attention for  
684 motion and color. *Vision Res* 43, 629-637.
- 685 51. O'Craven, K.M., Rosen, B.R., Kwong, K.K., Treisman, A., and Savoy, R.L. (1997). Voluntary  
686 attention modulates fMRI activity in human MT-MST. *Neuron* 18, 591-598.
- 687 52. Treue, S., and Martinez Trujillo, J.C. (1999). Feature-based attention influences motion  
688 processing gain in macaque visual cortex. *Nature* 399, 575-579.
- 689 53. Saenz, M., Buracas, G.T., and Boynton, G.M. (2002). Global effects of feature-based  
690 attention in human visual cortex. *Nat Neurosci* 5, 631-632.
- 691 54. Liu, T., Larsson, J., and Carrasco, M. (2007). Feature-based attention modulates orientation-  
692 selective responses in human visual cortex. *Neuron* 55, 313-323.
- 693 55. Serences, J.T., and Boynton, G.M. (2007). Feature-based attentional modulations in the  
694 absence of direct visual stimulation. *Neuron* 55, 301-312.
- 695 56. Zhang, W., and Luck, S.J. (2009). Feature-based attention modulates feedforward visual  
696 processing. *Nat Neurosci* 12, 24-25.
- 697 57. White, A.L., and Carrasco, M. (2011). Feature-based attention involuntarily and  
698 simultaneously improves visual performance across locations. *J Vis* 11.
- 699 58. White, A.L., Rolfs, M., and Carrasco, M. (2015). Stimulus competition mediates the joint  
700 effects of spatial and feature-based attention. *J Vis* 15, 7.
- 701 59. Jia, K., Zamboni, E., Kemper, V., Rua, C., Goncalves, N.R., Ng, A.K.T., Rodgers, C.T.,  
702 Williams, G., Goebel, R., and Kourtzi, Z. (2020). Recurrent Processing Drives Perceptual  
703 Plasticity. *Curr Biol* 30, 4177-4187 e4174.
- 704 60. Jeter, P.E., Doshier, B.A., Petrov, A., and Lu, Z.L. (2009). Task precision at transfer  
705 determines specificity of perceptual learning. *J Vis* 9, 1 1-13.
- 706 61. Hussain, Z., Bennett, P.J., and Sekuler, A.B. (2012). Versatile perceptual learning of textures  
707 after variable exposures. *Vision Res* 61, 89-94.
- 708 62. Lengyel, G., and Fiser, J. (2019). The relationship between initial threshold, learning, and  
709 generalization in perceptual learning. *J Vis* 19, 28.
- 710 63. Yang, J., Yan, F.F., Chen, L., Xi, J., Fan, S., Zhang, P., Lu, Z.L., and Huang, C.B. (2020).  
711 General learning ability in perceptual learning. *Proc Natl Acad Sci U S A* 117, 19092-19100.
- 712 64. Morgan, M.J., Watamaniuk, S.N., and McKee, S.P. (2000). The use of an implicit standard  
713 for measuring discrimination thresholds. *Vision Res* 40, 2341-2349.
- 714 65. Ho, T.C., Brown, S., Abuyo, N.A., Ku, E.H., and Serences, J.T. (2012). Perceptual  
715 consequences of feature-based attentional enhancement and suppression. *J Vis* 12, 15.
- 716 66. Stormer, V.S., and Alvarez, G.A. (2014). Feature-based attention elicits surround  
717 suppression in feature space. *Curr Biol* 24, 1985-1988.
- 718 67. Treue, S. (2014). Attentional selection: Mexican hats everywhere. *Curr Biol* 24, R838-R839.
- 719 68. Fang, M.W.H., Becker, M.W., and Liu, T. (2019). Attention to colors induces surround  
720 suppression at category boundaries. *Sci Rep* 9, 1443.
- 721 69. Martinez-Trujillo, J.C., and Treue, S. (2004). Feature-based attention increases the selectivity  
722 of population responses in primate visual cortex. *Curr Biol* 14, 744-751.
- 723 70. Jehee, J.F., Ling, S., Swisher, J.D., van Bergen, R.S., and Tong, F. (2012). Perceptual  
724 learning selectively refines orientation representations in early visual cortex. *J Neurosci* 32,  
725 16747-16753a.
- 726 71. Adab, H.Z., and Vogels, R. (2011). Practicing coarse orientation discrimination improves  
727 orientation signals in macaque cortical area v4. *Curr Biol* 21, 1661-1666.

- 728 72. Petrov, A.A., Doshier, B.A., and Lu, Z.L. (2005). The dynamics of perceptual learning: an  
729 incremental reweighting model. *Psychol Rev* 112, 715-743.
- 730 73. Doshier, B.A., and Lu, Z.L. (2009). Hebbian Reweighting on Stable Representations in  
731 Perceptual Learning. *Learn Percept* 1, 37-58.
- 732 74. Doshier, B.A., Jeter, P., Liu, J., and Lu, Z.L. (2013). An integrated reweighting theory of  
733 perceptual learning. *Proc Natl Acad Sci U S A* 110, 13678-13683.
- 734 75. Doshier, B.A., and Lu, Z.L. (2017). Visual Perceptual Learning and Models. *Annu Rev Vis Sci*  
735 3, 343-363.
- 736 76. Doshier, B.A., and Lu, Z.L. (1998). Perceptual learning reflects external noise filtering and  
737 internal noise reduction through channel reweighting. *Proc Natl Acad Sci U S A* 95, 13988-  
738 13993.
- 739 77. Doshier, B.A., and Lu, Z.L. (1999). Mechanisms of perceptual learning. *Vision Res* 39, 3197-  
740 3221.
- 741 78. Baldassi, S., and Verghese, P. (2005). Attention to locations and features: different top-down  
742 modulation of detector weights. *J Vis* 5, 556-570.
- 743 79. Ling, S., Liu, T., and Carrasco, M. (2009). How spatial and feature-based attention affect the  
744 gain and tuning of population responses. *Vision Res* 49, 1194-1204.
- 745 80. Serences, J.T., Saproo, S., Scolari, M., Ho, T., and Muftuler, L.T. (2009). Estimating the  
746 influence of attention on population codes in human visual cortex using voxel-based tuning  
747 functions. *Neuroimage* 44, 223-231.
- 748 81. Carrasco, M., and Barbot, A. (2014). How Attention Affects Spatial Resolution. *Cold Spring*  
749 *Harb Symp Quant Biol* 79, 149-160.
- 750 82. Connolly, P.M., Bennur, S., and Gold, J.I. (2009). Correlates of perceptual learning in an  
751 oculomotor decision variable. *J Neurosci* 29, 2136-2150.
- 752 83. Yang, T., and Maunsell, J.H. (2004). The effect of perceptual learning on neuronal responses  
753 in monkey visual area V4. *J Neurosci* 24, 1617-1626.
- 754 84. Law, C.T., and Gold, J.I. (2008). Neural correlates of perceptual learning in a sensory-motor,  
755 but not a sensory, cortical area. *Nat Neurosci* 11, 505-513.
- 756 85. Li, W., Piech, V., and Gilbert, C.D. (2008). Learning to link visual contours. *Neuron* 57, 442-  
757 451.
- 758 86. Xiong, Y.Z., Zhang, J.Y., and Yu, C. (2016). Bottom-up and top-down influences at untrained  
759 conditions determine perceptual learning specificity and transfer. *Elife* 5.
- 760 87. Tan, Q., Wang, Z., Sasaki, Y., and Watanabe, T. (2019). Category-Induced Transfer of Visual  
761 Perceptual Learning. *Curr Biol* 29, 1374-1378 e1373.
- 762 88. Maniglia, M., and Seitz, A.R. (2018). Towards a whole brain model of Perceptual Learning.  
763 *Curr Opin Behav Sci* 20, 47-55.
- 764 89. Cavanaugh, M.R., Barbot, A., Carrasco, M., and Huxlin, K.R. (2019). Feature-based attention  
765 potentiates recovery of fine direction discrimination in cortically blind patients.  
766 *Neuropsychologia* 128, 315-324.
- 767 90. Brainard, D.H. (1997). The Psychophysics Toolbox. *Spat Vis* 10, 433-436.
- 768 91. Pelli, D.G. (1997). The VideoToolbox software for visual psychophysics: transforming  
769 numbers into movies. *Spat Vis* 10, 437-442.
- 770 92. Cousineau, D. (2005). Confidence intervals in within-subject designs: A simpler solution to  
771 Loftus and Masson's method. *Tutorials in Quantitative Methods for Psychology* 1, p. 42-45.  
772  
773



774 **FIGURES**  
 775  
 776

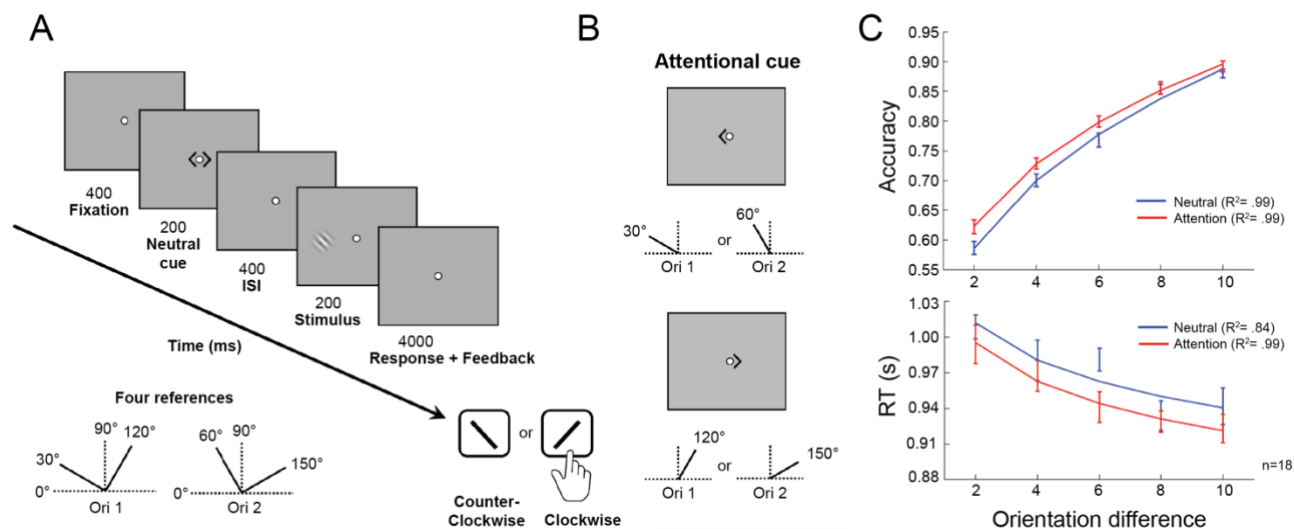

777  
 778  
 779  
 780 **Fig 1. Perceptual benefit of feature-based attention in the orientation discrimination task.** (A)  
 781 Illustration of the orientation discrimination task. Before each block, one of the reference  
 782 combinations (bottom left), each consisting of two reference orientations (30°/120°, or 60°/150°),  
 783 was shown to observers, but never appeared on the screen during the stimulus presentation. In the task,  
 784 each trial began with a fixation period of 400ms followed by a 200ms cue (neutral or attention). After  
 785 400ms ISI, a Gabor stimulus was presented for a single interval of 200ms, and the observer's task  
 786 was to judge whether the orientation of the stimulus was counter-clockwise or clockwise relative to  
 787 the closest reference orientation shown before the block with a key-press within 4s. (B) Attentional  
 788 cue. In the attention condition, the cue was either a leftward arrowhead indicating a reference angle  
 789 of 30° or 60°, or a rightward arrowhead indicating 120° or 150°, depending on which reference  
 790 combination was used in each block. (C) Deploying FBA (red line) significantly improved accuracy  
 791 (upper panel) in the orientation discrimination task, without any speed-accuracy trade-off (lower  
 792 panel) compared to the neutral condition (blue line). Error bars represent  $\pm 1$  within-subject SEM.  
 793

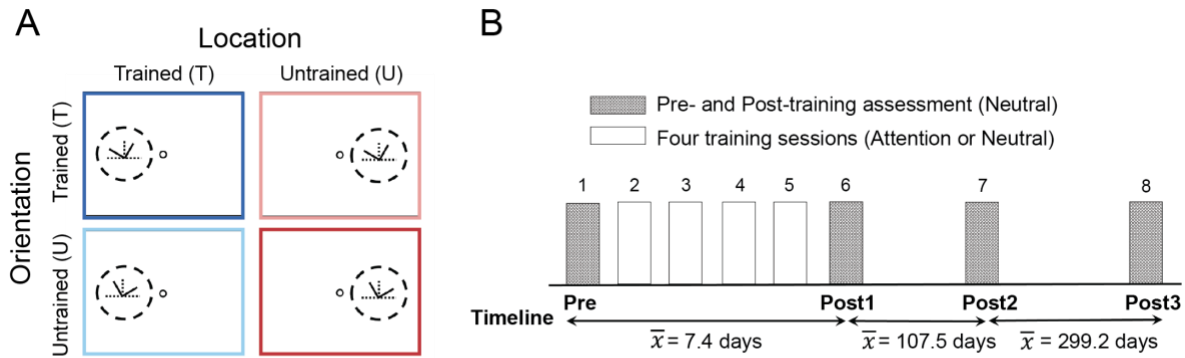

794  
795  
796  
797  
798  
799  
800  
801  
802  
803  
804  
805

**Fig 2. Illustration of the experimental conditions and protocol in the perceptual learning study.** (A) Trained and untrained conditions in the testing sessions. The dark blue, light blue, light red, and dark red panels represent trained location/orientation (TL, TO), trained location/untrained orientation (TL, UO), untrained location/trained orientation (UL, TO), and untrained location/orientation (UL, UO), respectively. (B) Schematic illustration of the 6-day VPL experiment. Observers were tested on day 1 (Pre-test) and day 6 (Post-test 1), and were trained with a neutral cue or an attentional cue on days 2-5 depending on their assigned group. Observers performed an identical testing session 3-4 months (Post-test 2) and more than 1 year (Post-test 3) after completion of the VPL experiment to assess the duration of training effects of perceptual learning.

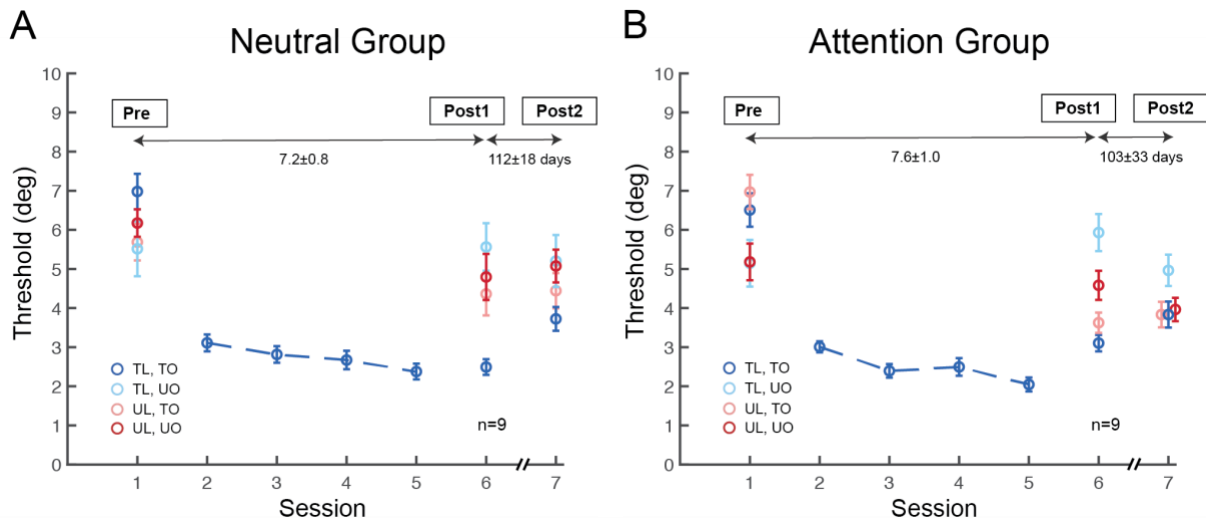

806  
807  
808  
809  
810  
811  
812  
813  
814  
815  
816  
817  
818  
819  
820

**Fig 3. Spatial-transfer, but not feature-transfer, induced by feature-based attention in perceptual learning.** (A) Session-by-session thresholds for orientation learning in the Neutral group. Performance improved for the trained feature at the trained location (dark blue circles), but not in the other three untrained conditions. The Neutral group exhibited both location- and feature- specificity in Post-test 1, as well as in Post-test 2. (B) Session-by-session thresholds for orientation learning in the Attention group. Similar to the Neutral group, observers retained improvement in the trained condition in both Post-test 1 and Post-test 2. (dark blue circles). Remarkably, training with FBA enabled complete learning transfer to the untrained location (light red circles), but not to the untrained orientation (light blue, dark red circles). Moreover, the improvement and location transfer induced by FBA persisted up to 3-4 months after training (dark blue, light red circles). Error bars represent  $\pm 1$  within-subject SEM.

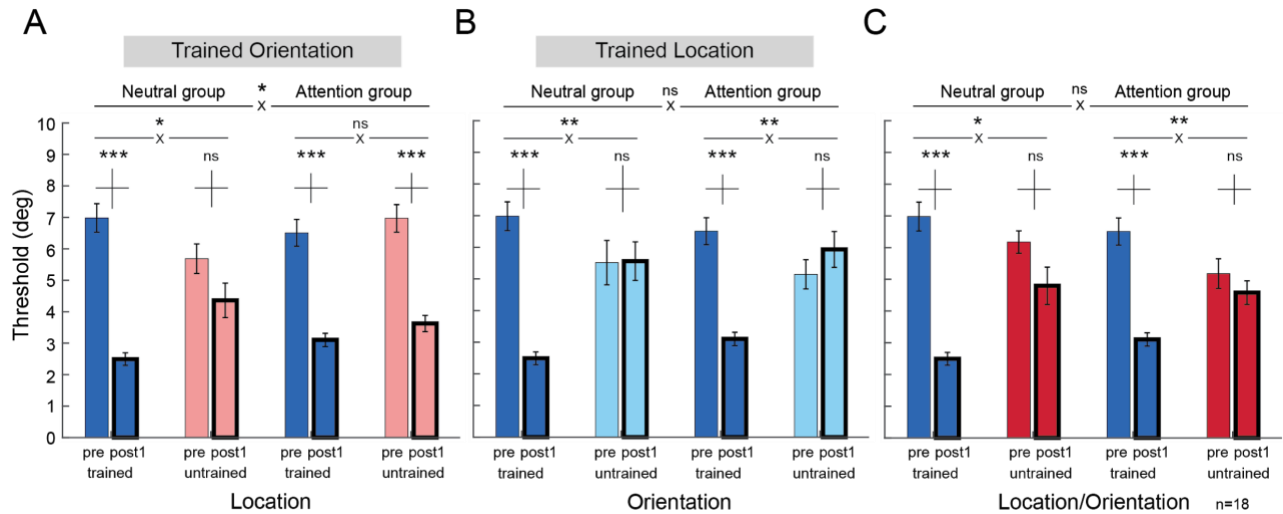

821  
822  
823  
824  
825  
826  
827  
828  
829  
830  
831

**Fig 4. Threshold comparisons of Pre-test versus Post-test 1 between the Neutral and Attention groups.** The trained condition was compared with the (A) untrained location, (B) untrained orientation, and (C) untrained location and orientation between the two groups. Learning transfer was found only in the untrained location in the Attention group (A), but not in the other untrained conditions (B,C) of either group (n=9 per group). \*  $p < 0.05$ ; \*\*  $p < 0.01$ ; \*\*\*  $p < 0.001$ . Error bars represent  $\pm 1$  within-subject SEM. Vertical bars above paired comparisons represent  $\pm 1$  SEM for the mean threshold difference between Pre-test and Post-test 1.

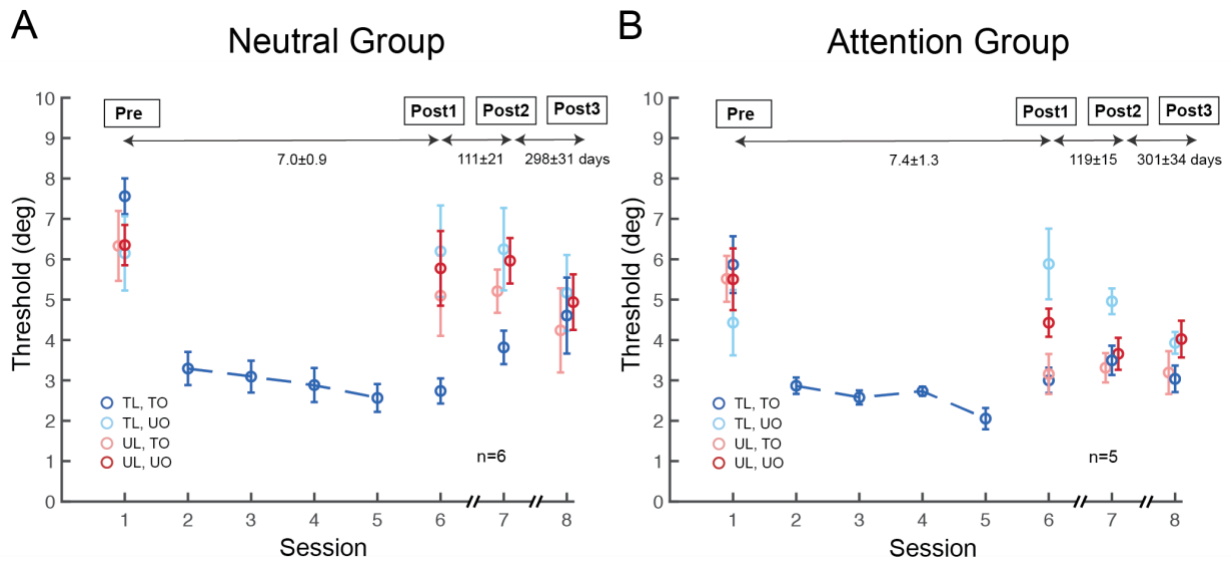

832  
833  
834  
835  
836  
837  
838  
839  
840  
841

**Fig 5. Session-by-session thresholds of Pre-test, Post-test 1, Post-test 2, and Post-test 3 in the Neutral and Attention groups.** 6 observers from the Neutral group and 5 observers from the Attention group were re-tested 1 year after the completion of training. Similar to results in Post-tests 1 and 2, the perceptual improvement in both groups and location transfer in the Attention group were preserved. Error bars represent  $\pm 1$  within-subject SEM.

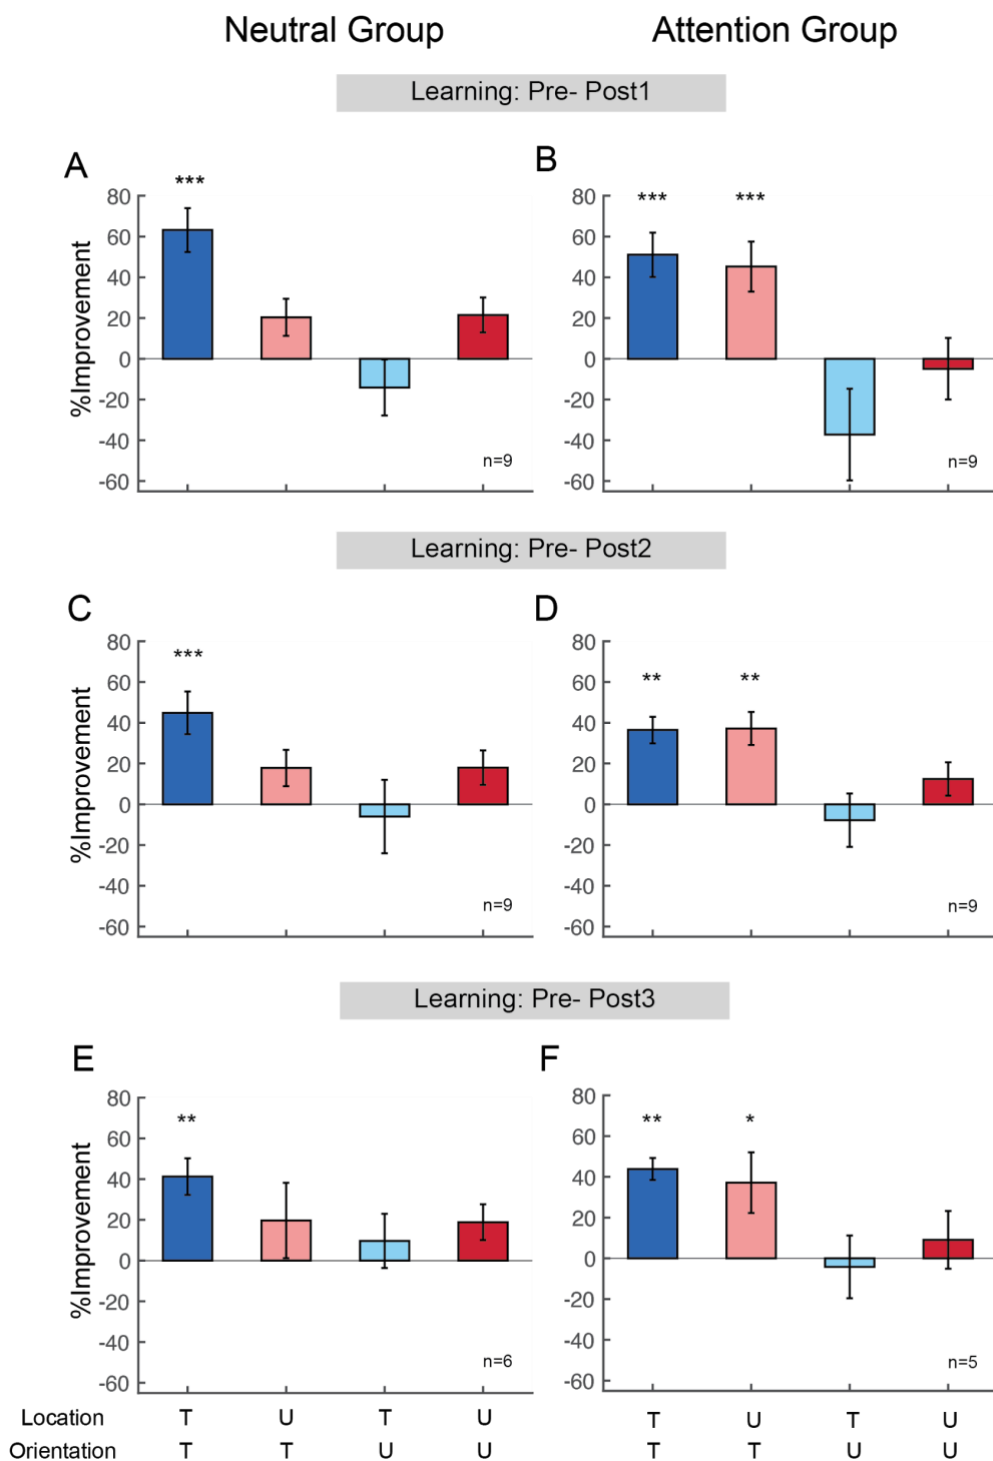

842  
843  
844  
845  
846  
847  
848  
849  
850

**Fig 6. Performance changes at Post-test 1, Post-test 2 and Post-test 3 between the Neutral and Attention groups.** (A, B) Performance changes between Pre-test and Post-test 1. The Neutral and Attention group showed significant learning in the trained condition (dark blue bars in A, B). Contrary to the Neutral group, training with FBA unlocked location specificity (light red bar in B), while preserving orientation specificity (light blue, dark red bars in B). (C, D) Performance changes between Pre-test and Post-test 2. Consistent with the results in Post-test 1, the improvement in both groups (dark blue bars in C, D) and location transfer in the Attention group (light red bar in D) were

851 preserved 3-4 months after completion of training. (**E, F**) Performance changes between Pre-test  
852 and Post-test 3. The improvement in both groups (dark blue bars in **E, F**) and location transfer  
853 induced by FBA (light red bar in **F**) persisted longer than 1 year after training. \*  $p < 0.05$ ; \*\*  $p < 0.01$ ;  
854 \*\*\*  $p < 0.001$ . Error bars represent  $\pm 1$  within-subject SEM.  
855
